# Supplementary material
Source: Springer Nature journal article supplement (https://www.springermedizin.de/resource/supplementary/13075_2009_2735_MOESM7_ESM.pdf/9692770)

IL-2

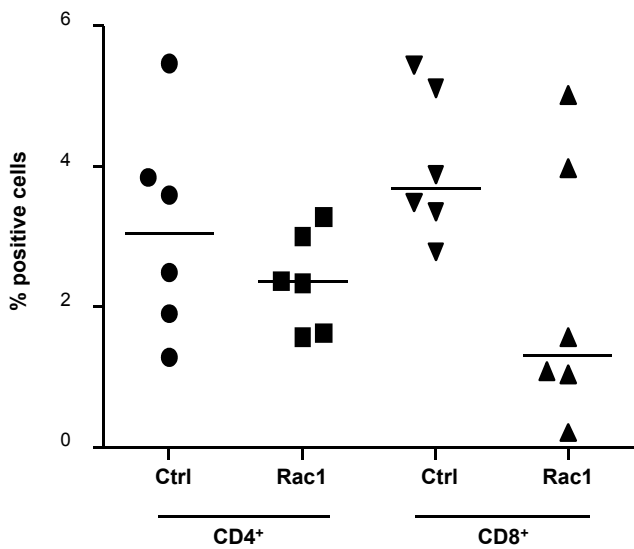TNF $\alpha$ 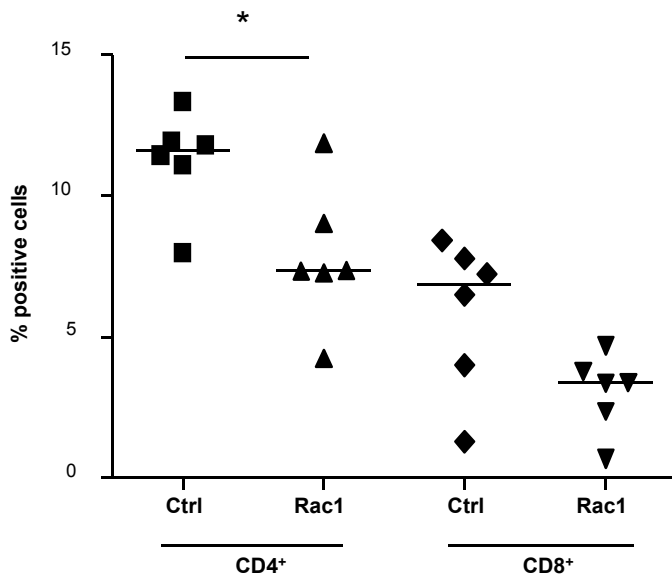IFN $\gamma$ 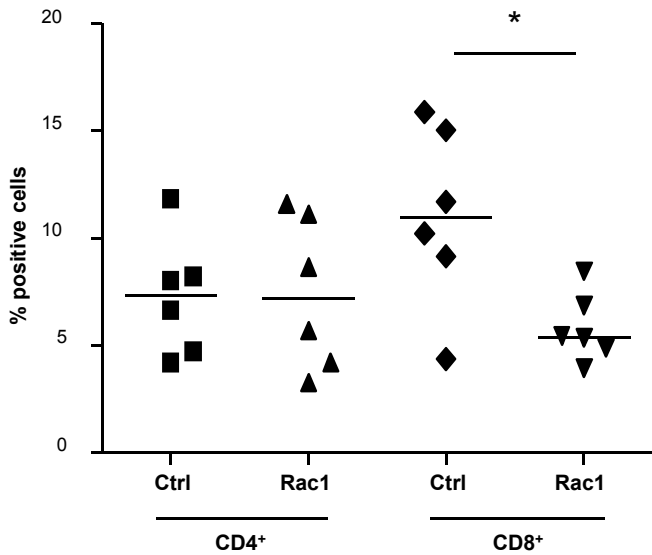

IL-17

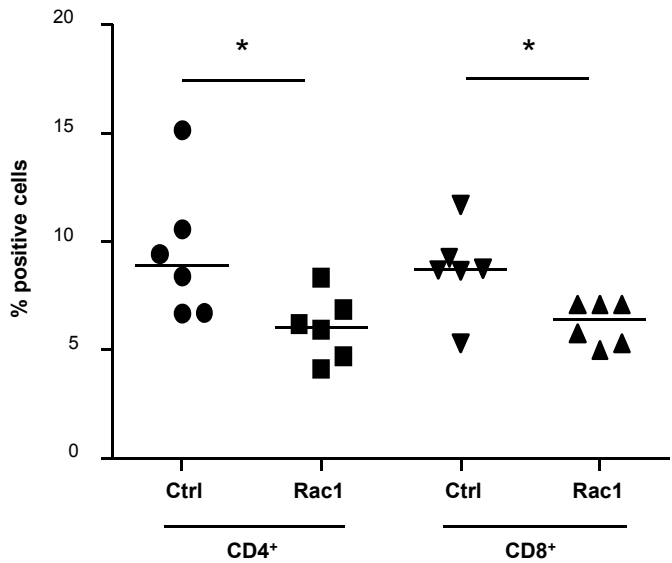

Supplement: MOESM7 [file 9692770]
